# Supplementary material
Source: ML conference proceedings conference paper supplement (https://openreview.net/forum?id=zoTUH3Fjup)
Supplement: supplementary_material [file attachment]

## A DETAILED ANALYSIS OF BACK-PROPAGATION

We rigorously analyze the neural network represented in Section 2.3: for sample index  $i \in [B]$ ,

$$\underbrace{\mathbf{a}_{l+1,i}}_{\mathbb{R}^{T \times d'}} = \phi(\underbrace{\mathbf{s}_{l,i}}_{\mathbb{R}^{T \times p}}), \quad \mathbf{s}_{l,i} = \underbrace{\mathbf{a}_{l,i}}_{\mathbb{R}^{T \times d}} \underbrace{\mathbf{W}_l}_{\mathbb{R}^{d \times p}} + \underbrace{\mathbf{1}}_{\mathbb{R}^{T \times 1}} \cdot \underbrace{\mathbf{b}_l}_{\mathbb{R}^{1 \times p}}, \quad (5)$$

Then the per-sample weight gradient is given by the chain rule as

$$\frac{\partial \mathcal{L}_i}{\partial \mathbf{W}_l}^\top = \sum_j \frac{\partial \mathcal{L}_i}{\partial \mathbf{s}_{l,j}} \frac{\partial \mathbf{s}_{l,j}}{\partial \mathbf{W}_l} = \frac{\partial \mathcal{L}_i}{\partial \mathbf{s}_{l,i}} \frac{\partial \mathbf{s}_{l,i}}{\partial \mathbf{W}_l} = \frac{\partial \mathcal{L}_i}{\partial \mathbf{s}_{l,i}} \mathbf{a}_{l,i} = \frac{\partial \mathcal{L}}{\partial \mathbf{s}_{l,i}}^\top \mathbf{a}_{l,i}$$

in which the second equality holds when there is no parameter sharing (so that each per-sample loss only depends on  $i$ -th input and output). The last equality holds for the same reason.

Similarly, we have the per-sample bias gradient as

$$\frac{\partial \mathcal{L}_i}{\partial \mathbf{b}_l}^\top = \sum_j \frac{\partial \mathcal{L}_i}{\partial \mathbf{s}_{l,j}} \frac{\partial \mathbf{s}_{l,j}}{\partial \mathbf{b}_l} = \frac{\partial \mathcal{L}_i}{\partial \mathbf{s}_{l,i}} \frac{\partial \mathbf{s}_{l,i}}{\partial \mathbf{b}_l} = \frac{\partial \mathcal{L}_i}{\partial \mathbf{s}_{l,i}} \mathbf{1} = \frac{\partial \mathcal{L}}{\partial \mathbf{s}_{l,i}}^\top \mathbf{1}.$$

We additionally demonstrate that bias gradient is independent of the input  $\mathbf{a}_l$ , on the convolution (1d/2d/3d) and the normalization layers. For the convolution,  $\mathbf{s}_l$  is the inversely folded output and  $\mathbf{a}_l$  is the unfolded input, then the forward pass is the same as that of linear layer in Equation (5). Notice that  $T$  is the product of hidden feature dimension (c.f. Bu et al. (2022a)), which depends on the padding, kernel sizes, strides, etc. For the batch, layer, group, and instance normalization, the forward pass is

$$\mathbf{s}_{l,i} = \frac{\mathbf{a}_{l,i} - \mathbb{E}(\mathbf{a}_l)}{\sqrt{\text{Var}(\mathbf{a}_l) + 0.00001}} \cdot \mathbf{W}_l + \mathbf{1} \cdot \mathbf{b}_l$$

which can be analyzed similarly to that of Equation (5).

## B IMPLEMENTATION OF DP-BiTfIT

In this section we describe the implementation of DP-BiTfIT, which only uses Pytorch backward hook but not the forward hook, and thus is different from existing packages such as FastGradClip Lee & Kifer (2020), Opacus Yousefpour et al. (2021), Private Transformers Li et al. (2021), Private CNN Bu et al. (2022a). Notice that in these packages, the forward hook is used to store the activation tensor  $\mathbf{a}_l$  for all layers, which incurs huge memory burden as discussed in Section 2.4.

The Pytorch backward hook is a function, to be registered on a torch Module (or a layer in the neural network), that will be executed in the backward propagation. The backward hook automatically extracts the input gradient  $\frac{\partial \mathcal{L}}{\partial \mathbf{a}_l}$  and the output gradient  $\frac{\partial \mathcal{L}}{\partial \mathbf{s}_l}$  of the layer.

In DP-BiTfIT, we call `register_backward_hook` to register a backward hook for Line 5 of Algorithm 1. An example for a linear layer:  $\mathbb{R}^{B \times T \times d} \rightarrow \mathbb{R}^{B \times T \times p}$  looks like

```
def hook(linear_layer, grad_input, grad_output):
    linear_layer.bias.grad_sample = grad_output.sum(dim=1)
    linear_layer.bias.norm_sample = linear_layer.bias.grad_sample.norm(2, dim=1)
```

Here the attribute `norm_sample` stores the per-sample gradient norm  $\left\| \frac{\partial \mathcal{L}_i}{\partial \mathbf{b}_l} \right\|_F$ , and the attribute `grad_sample` stores the  $\mathbb{R}^{B \times p}$  per-sample gradient of bias.

Then the implementation of DP-BiTfIT for one iteration looks like

```
output=model(input)
loss=F.cross_entropy()(output,label)
torch.autograd.grad(loss,biases)
all_layer_norm_sample = torch.stack([param.norm_sample for param in biases],dim=0).norm(2, dim=0)
clipping_factor=1/(all_layer_norm_sample+0.01)
for layer in model.modules():
    layer.bias.grad=torch.einsum("i,i,...->...", clipping_factor,layer.bias.grad_sample)
optimizer.step()
optimizer.zero_grad()
```

where `biases` is the collection of all bias terms in all layers.

## C COMPLEXITY ANALYSIS

We provide more details on analyzing the time and space complexity. The analysis for full fine-tuning has been presented in (Bu et al., 2022a, Appendix C) and is adapted here for the parameter efficient fine-tuning: for example, Adapter Houlsby et al. (2019) uses two matrices  $W_{down} \in \mathbb{R}^{p \times r}$ ,  $W_{up} \in \mathbb{R}^{r \times p}$  that constitute

$$x \leftarrow x + \text{GeLU}(x \cdot W_{down})W_{up}$$

Hence the complexity, in comparison to full-finetuning, changes by replacing  $d \rightarrow 2r$ .

LoRA Hu et al. (2021) also uses two matrices  $W_{down} \in \mathbb{R}^{d \times r}$ ,  $W_{up} \in \mathbb{R}^{r \times p}$  that constitute

$$x \leftarrow x \cdot W + x \cdot W_{down}W_{up}$$

Hence the complexity, in comparison to full-finetuning, changes by replacing  $pd \rightarrow r(p + d)$ .

|                  | forward<br>& output grad | weight training |                  |                 |              | bias training |           |
|------------------|--------------------------|-----------------|------------------|-----------------|--------------|---------------|-----------|
|                  |                          | non-DP          | DP full (Opacus) | DP LoRA         | DP Adapter   | non-DP        | DP (ours) |
| Time complexity  | $4BTpd$                  | $2BTpd$         | $+2BTpd$         | $+2BT(pr + dr)$ | $+4BTpr$     | $BTp$         | $+3Bp$    |
| Space complexity | $pd + BTd$               | $BT(p + d)$     | $+Bpd$           | $+B(pr + dr)$   | $+2Bpr$      | $p$           | $+Bp$     |
| # back-prop      |                          | 1               | 1                | 1               | 1            | 1             | 1         |
| forward hook     |                          | $\times$        | $\checkmark$     | $\checkmark$    | $\checkmark$ | $\times$      | $\times$  |

Table 8: Per-layer time and space complexity of training on weights (full and parameter efficient fine-tuning) and biases. ‘+’ means additional overhead to non-DP training.

For per-sample bias gradient clipping, we need  $\frac{\partial \mathcal{L}_i}{\partial \mathbf{b}_i}^\top = \frac{\partial \mathcal{L}}{\partial \mathbf{s}_{i,i}}^\top \mathbf{1}$  in Equation (4), which consists of the *per-sample gradient instantiation* (i.e. summation along the feature dimension, from  $\mathbb{R}^{Tp} \rightarrow \mathbb{R}^p$ ,  $\frac{\partial \mathcal{L}}{\partial \mathbf{s}_{i,i}} \rightarrow \frac{\partial \mathcal{L}_i}{\partial \mathbf{b}_i}$ ), and computing the per-sample gradient norm (i.e. *taking the square* at each index and *summing all indices*). Here each operation in italic takes  $Bp$  time complexity, meaning the total time complexity is  $3Bp$ , but the space complexity is  $Bp$  if operated in-place.

## D EXPERIMENT DETAILS

### D.1 LANGUAGE TASKS

Throughout this work, the text datasets are processed and loaded from Huggingface Lhoest et al. (2021). We follow the same setup as Li et al. (2021); Bu et al. (2022b), such as  $\delta = 0.5 \times \text{sample size}$ . The full fine-tuning is implemented by Private Transformers codebase, version 0.2.0 (i.e. GhostClip algorithm Li et al. (2021)).

For text classification, we experiment on four datasets: **MNLI(m)**, the matched splits from Multi-Genre Natural Language Inference Corpus; **QQP**, the Quora Question Pairs2 dataset; **QNLI** The Stanford Question Answering dataset; **SST2** The Stanford Sentiment Treebank dataset.

To give a fair comparison, we use the same optimizer as in Li et al. (2021), i.e. DP-Adam with Abadi’s clipping.

| Dataset                | MNLI                    | QQP  | QNLI | SST2 |
|------------------------|-------------------------|------|------|------|
| epoch                  | 18                      | 18   | 6    | 3    |
| batch size             | 6000                    | 6000 | 2000 | 1000 |
| clipping threshold $R$ | 0.1                     |      |      |      |
| DP learning rate       | full 5e-4 / BiTfIT 5e-3 |      |      |      |
| non-DP learning rate   | full 5e-5 / BiTfIT 1e-3 |      |      |      |
| max sequence length    | 256                     |      |      |      |

Table 9: Hyperparameters of text classification in Table 4 and Table 13, using RoBERTa (base/large).

For E2E generation task, we experiment GPT2 models using the same optimizer as in Bu et al. (2022b), using DP-AdamW with automatic clipping.

| Model                         | GPT2-small | GPT2-medium | GPT2-large |
|-------------------------------|------------|-------------|------------|
| epoch                         | 10         |             |            |
| batch size                    | 1024       |             |            |
| DP learning rate (full)       | 2e-3       | 2e-3        | 2e-3       |
| non-DP learning rate (full)   | 2e-4       | 1e-4        | 1e-4       |
| DP learning rate (BiTFiT)     | 1e-2       |             |            |
| non-DP learning rate (BiTFiT) | 2e-3       |             |            |
| learning rate decay           | No         |             |            |
| max sequence length           | 100        |             |            |

Table 10: Hyperparameters of E2E generation task in Table 5 and Table 14, using GPT2.

## D.2 IMAGE TASKS

We give the experiments settings for image classification. For CIFAR10 and CIFAR100, we use the same setting as Bu et al. (2022a), e.g. 5 epochs for CrossViT/ViT and 3 epochs for BEiT-large. For CelebA, we use the same setting as Bu et al. (2022b), e.g. 10 epochs.

We use DP-Adam with Abadi’s clipping. We do not apply tricks such as random data augmentation, weight standardization Qiao et al. (2019), or parameter averaging Polyak & Juditsky (1992). Our experiments are heavily based on Private CNN (i.e. MixGhostClip algorithm Bu et al. (2022a)) and TIMM codebases.

| Dataset                   | CIFAR10  | CIFAR10    | CIFAR100   | CelebA   |
|---------------------------|----------|------------|------------|----------|
| Model                     | CrossViT | BEiT-large | BEiT-large | ResNet18 |
| epoch                     | 5        | 3          | 3          | 10       |
| batch size                | 1000     | 1000       | 1000       | 500      |
| clipping threshold        | 0.1      |            |            |          |
| DP learning rate (full)   | 1e-3     |            |            |          |
| DP learning rate (BiTFiT) | 5e-3     |            |            |          |
| learning rate decay       | No       |            |            |          |
| normalizing data          | Yes      | Yes        | Yes        | No       |

Table 11: Hyperparameters of image classification task in Section 4.3, Table 15, Table 16, Table 17.

## E ADDITIONAL TABLES AND FIGURES

## E.1 PARAMETER EFFICIENCY OF DP-BiTFiT

| Model                 | Number of params | % of params |
|-----------------------|------------------|-------------|
| VGG11                 | 133M             | 0.009       |
| VGG16                 | 138M             | 0.009       |
| VGG19                 | 144M             | 0.010       |
| ResNet18              | 11.7M            | 0.043       |
| ResNet34              | 21.8M            | 0.044       |
| ResNet50              | 25.6M            | 0.113       |
| ResNet101             | 44.5M            | 0.121       |
| ResNet152             | 60.2M            | 0.127       |
| wide_resnet50_2       | 68.9M            | 0.051       |
| wide_resnet101_2      | 126.9M           | 0.055       |
| convnext_base         | 88.6M            | 0.148       |
| convnext_large        | 197.8M           | 0.099       |
| ViT-small-patch16     | 22.0M            | 0.238       |
| ViT-base-patch16      | 86.6M            | 0.120       |
| ViT-large-patch16     | 304M             | 0.090       |
| beit_base_patch16_224 | 86.5M            | 0.088       |
| deit_base_patch16_224 | 86.4M            | 0.120       |
| GPT2-small            | 124M             | 0.082       |
| GPT2-medium           | 355M             | 0.076       |
| GPT2-large            | 774M             | 0.066       |
| RoBERTa-base          | 125M             | 0.083       |
| RoBERTa-large         | 355M             | 0.077       |
| BERT-base-uncased     | 109M             | 0.094       |
| BERT-large-uncased    | 335M             | 0.081       |
| BART-large            | 406M             | 0.082       |
| longformer-base-4096  | 149M             | 0.088       |
| longformer-large-4096 | 435M             | 0.080       |

Table 12: Parameter efficiency of (DP) BiTFiT on various models.

## E.2 MORE RESULTS ON DP-BiTFiT AND LANGUAGE TASKS

|                 | full (Li et al., 2021; Bu et al., 2022b) |                                       |                                      |                                       |                                      | BiTFiT (ours)                   |                                       |                                      |                                       |                                      |
|-----------------|------------------------------------------|---------------------------------------|--------------------------------------|---------------------------------------|--------------------------------------|---------------------------------|---------------------------------------|--------------------------------------|---------------------------------------|--------------------------------------|
| RoBERTa-base    |                                          |                                       |                                      |                                       |                                      |                                 |                                       |                                      |                                       |                                      |
|                 | standard<br>$\epsilon = \infty$          | DP <sub>Abadi</sub><br>$\epsilon = 8$ | DP <sub>AUTO</sub><br>$\epsilon = 8$ | DP <sub>Abadi</sub><br>$\epsilon = 3$ | DP <sub>AUTO</sub><br>$\epsilon = 3$ | standard<br>$\epsilon = \infty$ | DP <sub>Abadi</sub><br>$\epsilon = 8$ | DP <sub>AUTO</sub><br>$\epsilon = 8$ | DP <sub>Abadi</sub><br>$\epsilon = 3$ | DP <sub>AUTO</sub><br>$\epsilon = 3$ |
| Accuracy SST2   | 94.5                                     | 92.1                                  | 92.4                                 | 91.9                                  | 92.3                                 | 93.5                            | 92.4                                  | 92.4                                 | 92.0                                  | 92.0                                 |
| Accuracy QNLI   | 91.4                                     | 87.9                                  | 87.9                                 | 87.4                                  | 86.9                                 | 87.3                            | 86.5                                  | 86.7                                 | 86.4                                  | 86.1                                 |
| Accuracy QQP    | 87.3                                     | 86.1                                  | 86.6                                 | 85.6                                  | 85.8                                 | 86.1                            | 83.4                                  | 84.0                                 | 83.0                                  | 83.8                                 |
| Accuracy MNLI-m | 85.9                                     | 83.2                                  | 83.8                                 | 82.5                                  | 83.2                                 | 83.4                            | 82.6                                  | 82.6                                 | 81.5                                  | 82.0                                 |
| RoBERTa-large   |                                          |                                       |                                      |                                       |                                      |                                 |                                       |                                      |                                       |                                      |
|                 | standard<br>$\epsilon = \infty$          | DP <sub>Abadi</sub><br>$\epsilon = 8$ | DP <sub>AUTO</sub><br>$\epsilon = 8$ | DP <sub>Abadi</sub><br>$\epsilon = 3$ | DP <sub>AUTO</sub><br>$\epsilon = 3$ | standard<br>$\epsilon = \infty$ | DP <sub>Abadi</sub><br>$\epsilon = 8$ | DP <sub>AUTO</sub><br>$\epsilon = 8$ | DP <sub>Abadi</sub><br>$\epsilon = 3$ | DP <sub>AUTO</sub><br>$\epsilon = 3$ |
| Accuracy SST2   | 96.2                                     | 93.8                                  | 94.6                                 | 93.0                                  | 93.9                                 | 95.5                            | 94.5                                  | 94.7                                 | 94.5                                  | 94.6                                 |
| Accuracy QNLI   | 93.6                                     | 91.1                                  | 91.5                                 | 90.8                                  | 91.0                                 | 92.2                            | 91.0                                  | 91.1                                 | 90.3                                  | 90.8                                 |
| Accuracy QQP    | 87.9                                     | 86.9                                  | 87.5                                 | 86.6                                  | 86.8                                 | 87.9                            | 86.5                                  | 87.1                                 | 86.3                                  | 86.5                                 |
| Accuracy MNLI-m | 90.3                                     | 87.0                                  | 87.1                                 | 86.4                                  | 86.3                                 | 89.3                            | 87.6                                  | 87.7                                 | 87.2                                  | 87.2                                 |

Table 13: Accuracy of full fine-tuning and BiTFiT with RoBERTa, under different per-sample clipping functions (indicated as subscript, Abadi Abadi et al. (2016) and AUTO-S Bu et al. (2022b)). Same setting as Appendix D.

| Model                 | Fine-tuning | % of params | Privacy↓              | Perplexity↓ | BLEU↑ | ROGUE-L↑ | NIST↑ | METEOR↑ | CIDE↑ |
|-----------------------|-------------|-------------|-----------------------|-------------|-------|----------|-------|---------|-------|
| GPT2-small<br>(124M)  | full        | 100%        | standard              | 2.91        | 69.46 | 71.36    | 8.78  | 0.46    | 2.42  |
|                       |             |             | DP ( $\epsilon = 8$ ) | 2.33        | 63.60 | 67.07    | 7.71  | 0.40    | 1.94  |
|                       |             |             | DP ( $\epsilon = 3$ ) | 2.36        | 61.34 | 65.87    | 7.07  | 0.39    | 1.80  |
|                       | LoRA        | —           | standard              | —           | 69.68 | 71.71    | 8.82  | 0.46    | 2.49  |
|                       |             |             | DP ( $\epsilon = 8$ ) | —           | 63.39 | 67.53    | 7.45  | 0.41    | 1.95  |
|                       |             |             | DP ( $\epsilon = 3$ ) | —           | 58.15 | 65.77    | 5.46  | 0.37    | 1.58  |
|                       | prefix      | —           | standard              | —           | 68.85 | 70.81    | 8.72  | 0.45    | 2.35  |
|                       |             |             | DP ( $\epsilon = 8$ ) | —           | 49.26 | 60.73    | 5.53  | 0.36    | 1.57  |
|                       |             |             | DP ( $\epsilon = 3$ ) | —           | 47.77 | 58.96    | 5.25  | 0.36    | 1.51  |
| GPT2-medium<br>(355M) | full        | 100%        | standard              | 3.19        | 64.46 | 63.67    | 4.25  | 0.36    | 1.36  |
|                       |             |             | DP ( $\epsilon = 8$ ) | 2.89        | 60.13 | 64.96    | 6.14  | 0.37    | 1.62  |
|                       |             |             | DP ( $\epsilon = 3$ ) | 3.00        | 54.78 | 63.55    | 4.78  | 0.34    | 1.31  |
|                       | BiTFiT      | 0.082%      | standard              | 2.08        | 68.50 | 71.46    | 8.63  | 0.45    | 2.14  |
|                       |             |             | DP ( $\epsilon = 8$ ) | 2.25        | 64.22 | 67.53    | 8.17  | 0.42    | 2.08  |
|                       |             |             | DP ( $\epsilon = 3$ ) | 2.62        | 63.85 | 67.07    | 7.11  | 0.39    | 1.75  |
|                       | BiTFiT      | 0.076%      | standard              | 2.85        | 64.48 | 67.81    | 8.50  | 0.43    | 2.11  |
|                       |             |             | DP ( $\epsilon = 8$ ) | 2.67        | 61.02 | 66.13    | 7.18  | 0.39    | 1.80  |
|                       |             |             | DP ( $\epsilon = 3$ ) | 2.67        | 57.11 | 66.16    | 5.07  | 0.37    | 1.47  |
| GPT2-large<br>(774M)  | full        | 100%        | standard              | 1.79        | 66.84 | 70.38    | 8.73  | 0.46    | 2.36  |
|                       |             |             | DP ( $\epsilon = 8$ ) | 2.26        | 64.64 | 68.97    | 8.30  | 0.42    | 2.16  |
|                       |             |             | DP ( $\epsilon = 3$ ) | 2.65        | 64.18 | 67.86    | 7.94  | 0.40    | 2.01  |
|                       | BiTFiT      | 0.066%      | standard              | 2.79        | 65.79 | 67.61    | 8.55  | 0.43    | 2.21  |
|                       |             |             | DP ( $\epsilon = 8$ ) | 2.59        | 65.21 | 67.88    | 8.43  | 0.42    | 2.15  |
|                       |             |             | DP ( $\epsilon = 3$ ) | 2.61        | 65.18 | 67.90    | 8.34  | 0.42    | 2.12  |

Table 14: Accuracy of fine-tuning with GPT2 on E2E dataset. LoRA and prefix results are taken from Li et al. (2021). Same setting as Appendix D.

### E.3 MORE RESULTS ON TWO-PHASE TRAINING

| CIFAR10                |                |           |          |          |         |
|------------------------|----------------|-----------|----------|----------|---------|
| Model                  | Privacy        | DP-BiTFiT | 1+BiTFiT | 2+BiTFiT | DP full |
| beit_large_patch16_224 | $\epsilon = 1$ | 11.7      | 98.2     | 97.9     | 97.2    |
|                        | $\epsilon = 2$ | 10.0      | 98.3     | 98.0     | 97.3    |
|                        | $\epsilon = 4$ | 13.8      | 98.2     | 98.0     | 97.5    |
|                        | $\epsilon = 8$ | 10.1      | 98.5     | 98.0     | 97.8    |
| beit_base_patch16_224  | $\epsilon = 1$ | 10.0      | 96.6     | 96.0     | 95.4    |
|                        | $\epsilon = 2$ | 10.7      | 97.1     | 96.4     | 96.0    |
|                        | $\epsilon = 4$ | 14.0      | 97.2     | 96.6     | 96.2    |
|                        | $\epsilon = 8$ | 10.0      | 97.2     | 96.5     | 96.3    |
| deit_base_patch16_224  | $\epsilon = 1$ | 78.2      | 94.4     | 95.2     | 95.4    |
|                        | $\epsilon = 2$ | 75.0      | 95.4     | 95.2     | 95.6    |
|                        | $\epsilon = 4$ | 72.9      | 95.8     | 95.9     | 96.0    |
|                        | $\epsilon = 8$ | 71.2      | 96.1     | 96.0     | 96.3    |
| crossvit_base_240      | $\epsilon = 1$ | 74.3      | 92.4     | 94.3     | 95.2    |
|                        | $\epsilon = 2$ | 80.4      | 93.6     | 95.0     | 95.3    |
|                        | $\epsilon = 4$ | 81.0      | 94.9     | 95.8     | 95.7    |
|                        | $\epsilon = 8$ | 78.2      | 94.8     | 95.8     | 96.2    |
| vit_large_patch16_224  | $\epsilon = 1$ | 89.7      | 98.9     | 98.7     | 98.9    |
|                        | $\epsilon = 2$ | 90.6      | 98.8     | 98.9     | 98.9    |
|                        | $\epsilon = 4$ | 93.2      | 98.9     | 98.8     | 99.0    |
|                        | $\epsilon = 8$ | 93.9      | 99.0     | 98.9     | 99.0    |
| vit_base_patch16_224   | $\epsilon = 1$ | 86.7      | 95.2     | 97.0     | 96.8    |
|                        | $\epsilon = 2$ | 89.3      | 97.7     | 97.1     | 97.1    |
|                        | $\epsilon = 4$ | 88.3      | 97.7     | 97.2     | 97.2    |
|                        | $\epsilon = 8$ | 88.7      | 97.6     | 97.2     | 97.4    |

Table 15: Accuracy of two-phase fine-tuning on CIFAR10. Same setting as Appendix D.2 except ViT uses the following learning rate: DP full fine-tuning  $5e-4$ , DP-BiTFiT  $5e-3$ .

| CIFAR100               |                |           |          |          |         |
|------------------------|----------------|-----------|----------|----------|---------|
| Model                  | Privacy        | DP-BiTfIT | 1+BiTfIT | 2+BiTfIT | DP full |
| beit_large_patch16_224 | $\epsilon = 1$ | 1.0       | 86.9     | 87.8     | 87.0    |
|                        | $\epsilon = 2$ | 1.0       | 88.7     | 89.3     | 88.7    |
|                        | $\epsilon = 4$ | 1.0       | 89.7     | 89.7     | 89.6    |
|                        | $\epsilon = 8$ | 1.0       | 90.3     | 90.7     | 90.0    |
| beit_base_patch16_224  | $\epsilon = 1$ | 1.0       | 81.4     | 82.2     | 80.9    |
|                        | $\epsilon = 2$ | 1.0       | 83.4     | 83.4     | 83.1    |
|                        | $\epsilon = 4$ | 1.0       | 84.6     | 85.1     | 84.8    |
|                        | $\epsilon = 8$ | 1.0       | 84.9     | 85.6     | 85.2    |
| deit_base_patch16_224  | $\epsilon = 1$ | 10.9      | 49.1     | 65.9     | 69.1    |
|                        | $\epsilon = 2$ | 13.6      | 58.1     | 71.5     | 74.3    |
|                        | $\epsilon = 4$ | 15.7      | 64.5     | 73.9     | 77.1    |
|                        | $\epsilon = 8$ | 16.6      | 69.7     | 75.7     | 77.9    |
| crossvit_base_240      | $\epsilon = 1$ | 12.2      | 49.2     | 61.7     | 67.6    |
|                        | $\epsilon = 2$ | 12.3      | 56.8     | 65.3     | 71.6    |
|                        | $\epsilon = 4$ | 17.2      | 61.6     | 70.4     | 73.1    |
|                        | $\epsilon = 8$ | 20.9      | 63.4     | 72.8     | 74.2    |
| vit_large_patch16_224  | $\epsilon = 1$ | 14.0      | 73.5     | 86.0     | 87.7    |
|                        | $\epsilon = 2$ | 19.4      | 82.4     | 89.0     | 90.1    |
|                        | $\epsilon = 4$ | 24.3      | 87.5     | 89.9     | 91.0    |
|                        | $\epsilon = 8$ | 23.9      | 89.0     | 90.7     | 91.3    |
| vit_base_patch16_224   | $\epsilon = 1$ | 16.0      | 64.3     | 79.5     | 83.9    |
|                        | $\epsilon = 2$ | 22.9      | 77.0     | 83.8     | 85.5    |
|                        | $\epsilon = 4$ | 21.2      | 83.0     | 85.2     | 87.2    |
|                        | $\epsilon = 8$ | 26.2      | 83.8     | 86.5     | 87.1    |

Table 16: Accuracy of two-phase fine-tuning on CIFAR100. Same setting as Appendix D.2 except ViT uses the following learning rate: DP full fine-tuning  $5e-4$ , DP-BiTfIT  $5e-3$ .

| Attributes          | DP-BiTfT       | 1+BiTfT | 2+BiTfT | DP full | DP-BiTfT       | 1+BiTfT | 2+BiTfT | DP full |
|---------------------|----------------|---------|---------|---------|----------------|---------|---------|---------|
|                     | $\epsilon = 3$ |         |         |         | $\epsilon = 8$ |         |         |         |
| 5 o Clock Shadow    | 90.01          | 90.01   | 90.14   | 91.32   | 90.01          | 90.01   | 90.51   | 91.64   |
| Arched Eyebrows     | 71.56          | 73.12   | 76.01   | 77.33   | 71.56          | 73.74   | 75.49   | 78.82   |
| Attractive          | 68.71          | 73.98   | 75.99   | 79.22   | 69.70          | 73.61   | 76.20   | 78.08   |
| Bags Under Eyes     | 79.74          | 79.76   | 81.27   | 81.73   | 79.74          | 79.74   | 80.69   | 82.62   |
| Bald                | 97.88          | 97.88   | 97.88   | 97.93   | 97.88          | 97.88   | 97.88   | 97.91   |
| Bangs               | 84.43          | 84.43   | 84.80   | 94.06   | 84.43          | 84.44   | 86.51   | 94.22   |
| Big Lips            | 67.30          | 67.30   | 67.30   | 67.78   | 67.30          | 67.30   | 67.29   | 68.34   |
| Big Nose            | 78.80          | 78.95   | 80.08   | 81.19   | 78.80          | 78.92   | 79.23   | 81.86   |
| Black Hair          | 72.84          | 74.86   | 82.37   | 85.84   | 73.02          | 78.71   | 83.33   | 86.47   |
| Blond Hair          | 89.54          | 93.00   | 93.28   | 94.17   | 89.13          | 92.62   | 93.88   | 94.34   |
| Blurry              | 94.94          | 94.94   | 94.94   | 95.05   | 94.94          | 94.94   | 94.96   | 95.10   |
| Brown Hair          | 82.03          | 82.02   | 82.87   | 85.44   | 82.03          | 82.37   | 83.49   | 85.04   |
| Bushy Eyebrows      | 87.05          | 87.05   | 87.21   | 88.26   | 87.05          | 87.05   | 87.15   | 89.02   |
| Chubby              | 94.70          | 94.70   | 94.70   | 94.84   | 94.70          | 94.70   | 94.70   | 94.78   |
| Double Chin         | 95.43          | 95.43   | 95.43   | 95.49   | 95.43          | 95.43   | 95.43   | 95.39   |
| Eyeglasses          | 93.54          | 93.54   | 93.54   | 94.30   | 93.54          | 93.54   | 93.54   | 95.85   |
| Goatee              | 95.42          | 95.42   | 95.42   | 95.96   | 95.42          | 95.42   | 95.42   | 95.89   |
| Gray Hair           | 96.81          | 96.81   | 96.85   | 97.44   | 96.81          | 96.81   | 97.12   | 97.45   |
| Heavy Makeup        | 76.51          | 82.76   | 85.71   | 88.48   | 77.22          | 83.03   | 85.86   | 89.05   |
| High Cheekbones     | 62.13          | 68.20   | 81.63   | 83.77   | 61.43          | 67.27   | 81.33   | 84.20   |
| Male                | 80.37          | 88.47   | 91.52   | 94.73   | 82.04          | 88.52   | 92.14   | 95.19   |
| Mouth Slightly Open | 54.03          | 59.32   | 77.61   | 86.75   | 55.26          | 60.70   | 79.42   | 90.24   |
| Mustache            | 96.13          | 96.13   | 96.13   | 96.10   | 96.13          | 96.13   | 96.13   | 96.12   |
| Narrow Eyes         | 85.13          | 85.13   | 85.13   | 85.14   | 85.13          | 85.13   | 85.13   | 85.16   |
| No Beard            | 85.37          | 85.87   | 87.56   | 92.94   | 85.37          | 85.88   | 88.59   | 93.59   |
| Oval Face           | 70.44          | 70.94   | 71.50   | 73.11   | 70.44          | 71.48   | 71.92   | 71.77   |
| Pale Skin           | 95.79          | 95.79   | 95.79   | 95.79   | 95.79          | 95.79   | 95.79   | 95.79   |
| Pointy Nose         | 71.43          | 71.51   | 71.63   | 71.89   | 71.43          | 71.47   | 71.77   | 72.87   |
| Receding Hairline   | 91.51          | 91.51   | 91.51   | 91.59   | 91.51          | 91.51   | 91.51   | 91.61   |
| Rosy Cheeks         | 92.83          | 92.83   | 92.86   | 93.07   | 92.87          | 92.83   | 92.86   | 93.33   |
| Sideburns           | 95.36          | 95.36   | 95.36   | 96.44   | 95.36          | 95.36   | 95.36   | 96.63   |
| Smiling             | 60.07          | 66.32   | 85.85   | 89.34   | 58.92          | 65.97   | 85.55   | 89.11   |
| Straight Hair       | 79.01          | 79.01   | 79.02   | 79.65   | 79.01          | 79.01   | 79.13   | 78.60   |
| Wavy Hair           | 71.24          | 73.09   | 76.22   | 77.35   | 70.86          | 73.62   | 77.11   | 72.73   |
| Wearing Earrings    | 79.34          | 79.34   | 80.37   | 83.24   | 79.34          | 79.34   | 80.71   | 84.36   |
| Wearing Hat         | 95.80          | 95.80   | 95.80   | 96.01   | 95.80          | 95.80   | 95.80   | 97.02   |
| Wearing Lipstick    | 80.61          | 87.90   | 89.81   | 91.59   | 80.35          | 87.20   | 89.56   | 91.94   |
| Wearing Necklace    | 86.21          | 86.21   | 86.21   | 86.21   | 86.21          | 86.21   | 86.21   | 86.21   |
| Wearing Necktie     | 92.99          | 92.99   | 93.03   | 93.58   | 92.99          | 92.99   | 93.11   | 93.57   |
| Young               | 75.71          | 79.33   | 81.23   | 83.69   | 75.71          | 78.52   | 80.66   | 83.11   |
| Average             | 82.97          | 84.42   | 86.54   | 88.20   | 83.01          | 84.52   | 86.71   | 88.38   |
| Total time          | 10:30          | 12:02   | 13:34   | 25:50   | 10:30          | 12:02   | 13:34   | 25:50   |

Table 17: Accuracy on CelebA dataset with settings in Appendix D.2 from one run. DP full fine-tuning is implemented with the most efficient MixGhostClip algorithm Bu et al. (2022a).
